# Supplementary material for: Paleoproterozoic East Pana Layered Intrusion (Kola Peninsula, Russia): Geological Structure, Petrography, Geochemistry and Cu-Ni-PGE Mineralization
Source: MDPI journal article supplement (doi:10.3390/min13050681), 2023-05-16
Supplement: s1 [file s1]

**Table S1.** Chemical composition of olivines from the East Pana massif (wt %).

**Table S2.** Chemical composition of orthopyroxenes from the East Pana massif (wt %).

**Table S3.** Chemical composition of clinopyroxenes from the East Pana massif (wt %).

**Table S4.** Chemical composition of plagioclases from the East Pana massif (wt %).

**Table S5.** Chemical composition of Mg-Fe amphiboles from the East Pana massif (wt %).

**Table S6.** Chemical composition of Ca-amphiboles from the East Pana massif (wt %).
