# Supplementary material for: Paleoproterozoic East Pana Layered Intrusion (Kola Peninsula, Russia): Geological Structure, Petrography, Geochemistry and Cu-Ni-PGE Mineralization
Source: MDPI journal article supplement (doi:10.3390/min13050681), 2023-05-16
Supplement: s1 [file s1]

**Table S1.** Chemical composition of olivines from the East Pana massif (wt %)

|                                           | 1              | 2             |
|-------------------------------------------|----------------|---------------|
| Samples                                   | 401/207,5(4)   | 53120/2180(2) |
| SiO <sub>2</sub>                          | 38,453         | 38,731        |
| TiO <sub>2</sub>                          | 0,000          | 0,000         |
| Al <sub>2</sub> O <sub>3</sub>            | 0,000          | 0,000         |
| FeO <sub>total</sub>                      | 21,517         | 20,366        |
| MnO                                       | 0,294          | 0,331         |
| MgO                                       | 39,894         | 39,323        |
| CaO                                       | 0,000          | 0,265         |
| NiO                                       | 0,272          | 0,266         |
| <b>Total</b>                              | <b>100,430</b> | <b>99,282</b> |
| Formula coefficients (per 4 oxygen atoms) |                |               |
| Si                                        | 0,993          | 1,007         |
| Fe                                        | 0,465          | 0,443         |
| Mn                                        | 0,006          | 0,007         |
| Mg                                        | 1,536          | 1,524         |
| Ca                                        | –              | 0,007         |
| Ni                                        | 0,006          | 0,006         |
| f#                                        | 23,24          | 22,52         |

Note: Microprobe analysis. 1 – from the olivine gabbro-norite, OHEC, East Chuarvy area; 2 – from the olivine gabbro-norite, Predgorny area.

$f\# = \text{Fe}/(\text{Fe}+\text{Mg}) \times 100$ .

Samples from the collection of T.V. Rundkvist.

**Table S2.** Chemical composition of orthopyroxenes from the East Pana massif (wt %)

|                                           | 1            | 2             | 3             | 4              | 5              | 6             | 7             | 8             | 9             |
|-------------------------------------------|--------------|---------------|---------------|----------------|----------------|---------------|---------------|---------------|---------------|
| Samples                                   | Smp. 39      | 428/21(2)     | 429/1(1)      | 429/11(2)      | 429/12(1)      | 429/12(4)     | 429/15(2)     | 429/16(1)     | 429/17(1)     |
| SiO <sub>2</sub>                          | 52,94        | 53,549        | 53,77         | 54,556         | 53,433         | 53,712        | 54,082        | 53,718        | 54,092        |
| TiO <sub>2</sub>                          | 0,16         | 0,289         | 0,330         | 0,232          | 0,153          | 0,250         | 0,115         | 0,179         | 0,183         |
| Al <sub>2</sub> O <sub>3</sub>            | 0,92         | 1,018         | 1,093         | 1,005          | 1,018          | 0,926         | 0,998         | 0,787         | 0,972         |
| Cr <sub>2</sub> O <sub>3</sub>            | n.d.         | 0,046         | 0,000         | 0,000          | 0,029          | 0,034         | 0,000         | 0,000         | 0,000         |
| V <sub>2</sub> O <sub>5</sub>             | n.d.         | 0,053         | 0,036         | 0,000          | 0,000          | 0,000         | 0,000         | 0,000         | 0,049         |
| FeO <sub>total</sub>                      | 15,99        | 17,616        | 18,308        | 17,351         | 18,261         | 19,337        | 18,946        | 19,077        | 18,845        |
| MnO                                       | 0,18         | 0,380         | 0,416         | 0,449          | 0,417          | 0,456         | 0,432         | 0,409         | 0,407         |
| MgO                                       | 28,02        | 24,718        | 23,123        | 25,131         | 24,275         | 23,146        | 23,985        | 24,105        | 23,677        |
| CaO                                       | 1,58         | 2,191         | 2,551         | 1,413          | 2,352          | 1,965         | 0,835         | 1,304         | 1,137         |
| NiO                                       | n.d.         | 0,046         | 0,000         | 0,055          | 0,031          | 0,033         | 0,000         | 0,000         | 0,076         |
| Na <sub>2</sub> O                         | 0,00         | 0,000         | 0,000         | 0,000          | 0,078          | 0,045         | 0,000         | 0,000         | 0,000         |
| K <sub>2</sub> O                          | 0,00         | 0,000         | 0,000         | 0,000          | 0,009          | 0,000         | 0,000         | 0,000         | 0,000         |
| <b>Total</b>                              | <b>99,79</b> | <b>99,906</b> | <b>99,627</b> | <b>100,192</b> | <b>100,054</b> | <b>99,904</b> | <b>99,392</b> | <b>99,579</b> | <b>99,437</b> |
| Formula coefficients (per 6 oxygen atoms) |              |               |               |                |                |               |               |               |               |
| Mg                                        | 1,52         | 1,350         | 1,270         | 1,361          | 1,329          | 1,272         | 1,316         | 1,325         | 1,300         |
| Fe                                        | 0,49         | 0,540         | 0,564         | 0,527          | 0,561          | 0,596         | 0,583         | 0,588         | 0,580         |
| Ca                                        | 0,06         | 0,086         | 0,101         | 0,055          | 0,093          | 0,078         | 0,033         | 0,052         | 0,045         |
| Ti                                        | –            | 0,008         | 0,009         | 0,006          | 0,004          | 0,007         | 0,003         | 0,005         | 0,005         |
| Mn                                        | 0,01         | 0,012         | 0,013         | 0,014          | 0,013          | 0,014         | 0,013         | 0,013         | 0,013         |
| Ni                                        | –            | 0,001         | –             | 0,002          | 0,001          | 0,001         | –             | –             | 0,002         |
| Na                                        | –            | –             | –             | –              | 0,006          | 0,003         | –             | –             | –             |
| V                                         | –            | 0,002         | 0,001         | –              | –              | –             | –             | –             | 0,001         |
| Al <sup>VI</sup>                          | –            | –             | 0,028         | 0,025          | –              | 0,021         | 0,034         | 0,015         | 0,034         |
| <b>Total B</b>                            | <b>2,08</b>  | <b>1,999</b>  | <b>1,986</b>  | <b>1,990</b>   | <b>2,007</b>   | <b>1,992</b>  | <b>1,982</b>  | <b>1,998</b>  | <b>1,980</b>  |
| Si                                        | 1,93         | 1,962         | 1,981         | 1,982          | 1,962          | 1,981         | 1,991         | 1,981         | 1,992         |
| Al <sup>IV</sup>                          | 0,04         | 0,044         | 0,019         | 0,018          | 0,044          | 0,019         | 0,009         | 0,019         | 0,008         |
| <b>Total T</b>                            | <b>1,97</b>  | <b>2,006</b>  | <b>2,000</b>  | <b>2,000</b>   | <b>2,006</b>   | <b>2,000</b>  | <b>2,000</b>  | <b>2,000</b>  | <b>2,000</b>  |

Continuation of Table 2

|                                           | 10             | 11               | 12               | 13              | 14              | 15                | 16                | 17            | 18             |
|-------------------------------------------|----------------|------------------|------------------|-----------------|-----------------|-------------------|-------------------|---------------|----------------|
| Samples                                   | 429/18(2)      | 401/<br>256,1(1) | 401/<br>207,5(1) | 445/<br>26,2(4) | 445/<br>52,0(5) | 55150/<br>2680(1) | 53120/<br>2180(2) | 6/2004        | 55700/<br>2280 |
| SiO <sub>2</sub>                          | 54,987         | 53,305           | 55,084           | 52,932          | 52,924          | 56,417            | 55,125            | 54,534        | 55,193         |
| TiO <sub>2</sub>                          | 0,242          | 0,236            | 0,157            | 0,376           | 0,446           | 0,172             | 0,292             | 0,137         | 0,151          |
| Al <sub>2</sub> O <sub>3</sub>            | 0,760          | 1,079            | 1,172            | 0,894           | 0,951           | 1,098             | 1,096             | 1,086         | 1,172          |
| Cr <sub>2</sub> O <sub>3</sub>            | 0,000          | 0,000            | 0,000            | 0,024           | 0,000           | 0,028             | 0,000             | 0,038         | 0,063          |
| FeO <sub>total</sub>                      | 15,155         | 20,586           | 12,941           | 21,423          | 21,404          | 11,341            | 13,159            | 13,56         | 12,929         |
| MnO                                       | 0,300          | 0,433            | 0,313            | 0,465           | 0,448           | 0,300             | 0,316             | 0,282         | 0,292          |
| MgO                                       | 27,605         | 23,182           | 28,427           | 20,961          | 22,012          | 28,167            | 27,338            | 27,429        | 29,069         |
| CaO                                       | 0,896          | 1,255            | 1,686            | 2,017           | 1,773           | 1,748             | 2,211             | 2,244         | 1,881          |
| NiO                                       | 0,060          | 0,000            | 0,078            | 0,053           | 0,060           | 0,075             | 0,059             | 0,052         | 0,074          |
| Na <sub>2</sub> O                         | 0,000          | 0,000            | 0,000            | 0,000           | 0,000           | 0,092             | 0,000             | 0,000         | 0,000          |
| K <sub>2</sub> O                          | 0,000          | 0,000            | 0,000            | 0,000           | 0,000           | 0,015             | 0,000             | 0,000         | 0,000          |
| <b>Total</b>                              | <b>100,004</b> | <b>100,076</b>   | <b>99,858</b>    | <b>99,143</b>   | <b>100,018</b>  | <b>99,453</b>     | <b>99,596</b>     | <b>99,362</b> | <b>100,824</b> |
| Formula coefficients (per 6 oxygen atoms) |                |                  |                  |                 |                 |                   |                   |               |                |
| Mg                                        | 1,481          | 1,277            | 1,515            | 1,173           | 1,221           | 1,492             | 1,464             | 1,477         | 1,536          |
| Fe                                        | 0,456          | 0,636            | 0,387            | 0,673           | 0,666           | 0,337             | 0,395             | 0,410         | 0,383          |
| Ca                                        | 0,035          | 0,050            | 0,065            | 0,081           | 0,071           | 0,067             | 0,085             | 0,087         | 0,071          |
| Ti                                        | 0,007          | 0,007            | 0,004            | 0,011           | 0,012           | 0,005             | 0,008             | 0,004         | 0,004          |
| Mn                                        | 0,009          | 0,014            | 0,009            | 0,015           | 0,014           | 0,009             | 0,010             | 0,009         | 0,009          |
| Cr                                        | –              | –                | –                | –               | –               | 0,001             | –                 | 0,001         | 0,002          |
| Ni                                        | 0,002          | –                | 0,002            | 0,002           | 0,002           | 0,002             | 0,002             | 0,002         | 0,002          |
| K                                         | –              | –                | –                | –               | –               | 0,001             | –                 | –             | –              |
| Na                                        | –              | –                | –                | –               | 0,000           | 0,006             | –                 | –             | –              |
| Al <sup>VI</sup>                          | 0,010          | 0,017            | 0,019            | 0,027           | 0,011           | 0,046             | 0,026             | 0,015         | 0,006          |
| <b>Total B</b>                            | <b>2,000</b>   | <b>2,001</b>     | <b>2,001</b>     | <b>1,982</b>    | <b>1,997</b>    | <b>1,966</b>      | <b>1,990</b>      | <b>2,005</b>  | <b>2,013</b>   |
| Si                                        | 1,978          | 1,97             | 1,97             | 1,987           | 1,969           | 2,005             | 1,980             | 1,969         | 1,957          |
| Al <sup>IV</sup>                          | 0,022          | 0,03             | 0,03             | 0,013           | 0,031           | –                 | 0,020             | 0,031         | 0,043          |
| <b>Total T</b>                            | <b>2,000</b>   | <b>2,000</b>     | <b>2,000</b>     | <b>2,000</b>    | <b>2,000</b>    | <b>2,005</b>      | <b>2,000</b>      | <b>2,000</b>  | <b>2,000</b>   |

Note: Microprobe analysis. 1 – from gabbro-norite, Sungyok area; 2 – 11 – from gabbro-norites of Ore Horizon of East Chuarvy (OHEC), East Chuarvy area; 12 – from olivine gabbro-norite of Ore Horizon of East Chuarvy (OHEC), East Chuarvy area; 13, 14 – from gabbro-norites of layered unit (gabbro-norite zone-2), East Chuarvy area; 15 – from gabbro-norite, Predgorny area; 16 – from olivine gabbro-norite, Predgorny area; 17, 18 – from gabbro-norites, Predgorny area. 1 – after [22]; 2 – 18 – Samples from the collection of T.V. Rundkvist. N.d. – not detected.

**Table S3.** Chemical composition of clinopyroxenes from the East Pana massif (wt %)

|                                           | 1             | 2                 | 3                 | 4             | 5            | 6            | 7             | 8             | 9            |
|-------------------------------------------|---------------|-------------------|-------------------|---------------|--------------|--------------|---------------|---------------|--------------|
| Samples                                   | 55700/2280    | 53120/<br>2180(2) | 55150/<br>2680(1) | 5321/2870     | Smp. 40      | 428/19(2)    | 428/21(3)     | 429/11(2)     | 429/15(1)    |
| SiO <sub>2</sub>                          | 52,47         | 51,35             | 53,91             | 52,50         | 50,88        | 51,29        | 51,51         | 52,31         | 51,75        |
| TiO <sub>2</sub>                          | 0,39          | 0,26              | 0,27              | 0,44          | 0,13         | 0,50         | 0,61          | 0,36          | 0,39         |
| Al <sub>2</sub> O <sub>3</sub>            | 2,09          | 1,86              | 1,74              | 2,07          | 2,31         | 1,92         | 1,75          | 1,50          | 2,06         |
| Cr <sub>2</sub> O <sub>3</sub>            | 0,10          | 0,00              | 0,04              | 0,00          | n.d.         | 0,03         | 0,04          | 0,06          | 0,00         |
| V <sub>2</sub> O <sub>5</sub>             | 0,00          | 0,00              | 0,05              | 0,07          | n.d.         | 0,00         | 0,08          | 0,00          | 0,08         |
| FeO <sub>total</sub>                      | 6,91          | 6,26              | 5,83              | 8,58          | 8,51         | 8,74         | 8,15          | 7,68          | 8,90         |
| MnO                                       | 0,22          | 0,17              | 0,17              | 0,32          | 0,16         | 0,25         | 0,25          | 0,24          | 0,22         |
| MgO                                       | 16,42         | 16,24             | 16,34             | 15,79         | 13,05        | 13,84        | 14,61         | 15,60         | 14,20        |
| CaO                                       | 21,17         | 22,78             | 22,53             | 19,99         | 21,60        | 22,48        | 22,80         | 22,26         | 21,12        |
| NiO                                       | 0,05          | 0,06              | 0,07              | 0,00          | n.d.         | 0,02         | 0,03          | 0,04          | 0,00         |
| Na <sub>2</sub> O                         | 0,29          | 0,22              | 0,22              | 0,21          | 2,69         | 0,31         | 0,29          | 0,23          | 0,23         |
| K <sub>2</sub> O                          | 0,00          | 0,01              | 0,02              | 0,03          | 0,02         | 0,00         | 0,03          | 0,00          | 0,00         |
| <b>Total</b>                              | <b>100,10</b> | <b>99,20</b>      | <b>101,18</b>     | <b>100,01</b> | <b>99,35</b> | <b>99,39</b> | <b>100,15</b> | <b>100,26</b> | <b>98,95</b> |
| Formula coefficients (per 6 oxygen atoms) |               |                   |                   |               |              |              |               |               |              |
| Mg                                        | 0,902         | 0,904             | 0,885             | 0,872         | 0,72         | 0,777        | 0,813         | 0,862         | 0,797        |
| Fe                                        | 0,213         | 0,196             | 0,177             | 0,266         | 0,26         | 0,275        | 0,254         | 0,238         | 0,28         |
| Ca                                        | 0,836         | 0,912             | 0,877             | 0,793         | 0,85         | 0,907        | 0,912         | 0,884         | 0,851        |
| Ti                                        | 0,011         | 0,007             | 0,007             | 0,012         | –            | 0,014        | 0,017         | 0,01          | 0,011        |
| Mn                                        | 0,007         | 0,005             | 0,005             | 0,010         | 0,01         | 0,008        | 0,008         | 0,007         | 0,007        |
| Cr                                        | 0,003         | –                 | 0,001             | –             | –            | –            | –             | –             | –            |
| Ni                                        | 0,002         | 0,002             | 0,002             | –             | –            | 0,001        | 0,001         | 0,001         | –            |
| K                                         | –             | –                 | 0,001             | 0,001         | –            | –            | –             | –             | –            |
| Na                                        | 0,021         | 0,016             | 0,016             | 0,015         | 0,19         | 0,023        | 0,021         | 0,016         | 0,017        |
| V                                         | –             | –                 | –                 | –             | –            | –            | 0,002         | –             | 0,002        |
| Al <sup>VI</sup>                          | 0,025         | –                 | 0,032             | 0,035         | –            | –            | –             | –             | 0,038        |
| Si                                        | 1,934         | 1,918             | 1,958             | 1,944         | 1,87         | 1,931        | 1,923         | 1,939         | 1,947        |
| Al <sup>IV</sup>                          | 0,066         | 0,082             | 0,042             | 0,056         | 0,10         | 0,085        | 0,077         | 0,065         | 0,053        |

Continuation of Table 3

|                                           | 10           | 11           | 12           | 13           | 14           | 15           | 16           | 17           |
|-------------------------------------------|--------------|--------------|--------------|--------------|--------------|--------------|--------------|--------------|
| Samples                                   | 429/16(3)    | 429/17(1)    | 445/52,0(4)  | 401/256,1(4) | 445/26,2(5)  | 401/207,5(2) | 401/230,5    | 401/232,0(2) |
| SiO <sub>2</sub>                          | 51,62        | 51,64        | 51,26        | 51,94        | 50,76        | 52,26        | 51,43        | 51,79        |
| TiO <sub>2</sub>                          | 0,49         | 0,38         | 0,64         | 0,31         | 0,65         | 0,31         | 0,39         | 0,40         |
| Al <sub>2</sub> O <sub>3</sub>            | 1,79         | 2,04         | 1,85         | 1,11         | 1,92         | 1,80         | 2,72         | 2,88         |
| Cr <sub>2</sub> O <sub>3</sub>            | 0,00         | 0,00         | 0,00         | 0,00         | 0,00         | 0,06         | 0,00         | 0,00         |
| V <sub>2</sub> O <sub>5</sub>             | 0,05         | 0,08         | 0,00         | 0,00         | 0,00         | 0,00         | 0,00         | 0,00         |
| FeO <sub>total</sub>                      | 8,97         | 9,40         | 10,23        | 9,47         | 10,34        | 6,05         | 8,00         | 6,46         |
| MnO                                       | 0,25         | 0,23         | 0,30         | 0,21         | 0,30         | 0,19         | 0,19         | 0,11         |
| MgO                                       | 14,52        | 14,09        | 13,29        | 14,02        | 12,54        | 16,29        | 15,53        | 15,79        |
| CaO                                       | 21,98        | 21,20        | 21,12        | 21,61        | 22,32        | 22,66        | 21,22        | 22,16        |
| NiO                                       | 0,00         | 0,00         | 0,00         | 0,00         | 0,00         | 0,00         | 0            | 0,05         |
| Na <sub>2</sub> O                         | 0,27         | 0,31         | 0,31         | 0,29         | 0,35         | 0,20         | 0,36         | 0,24         |
| K <sub>2</sub> O                          | 0,01         | 0,00         | 0,00         | 0,00         | 0,00         | 0,03         | 0,00         | 0,02         |
| <b>Total</b>                              | <b>99,94</b> | <b>99,36</b> | <b>98,99</b> | <b>98,96</b> | <b>99,17</b> | <b>99,85</b> | <b>99,84</b> | <b>99,91</b> |
| Formula coefficients (per 6 oxygen atoms) |              |              |              |              |              |              |              |              |
| Mg                                        | 0,810        | 0,790        | 0,751        | 0,790        | 0,711        | 0,898        | 0,861        | 0,870        |
| Fe                                        | 0,281        | 0,296        | 0,324        | 0,299        | 0,329        | 0,187        | 0,249        | 0,200        |
| Ca                                        | 0,881        | 0,854        | 0,858        | 0,875        | 0,909        | 0,898        | 0,845        | 0,878        |
| Ti                                        | 0,014        | 0,011        | 0,018        | 0,009        | 0,019        | 0,009        | 0,011        | 0,011        |
| Mn                                        | 0,008        | 0,007        | 0,009        | 0,007        | 0,01         | 0,006        | 0,006        | 0,003        |
| Cr                                        | –            | –            | –            | –            | –            | 0,001        | –            | –            |
| Ni                                        | –            | –            | –            | –            | –            | –            | –            | 0,001        |
| Na                                        | 0,019        | 0,022        | 0,026        | 0,012        | 0,017        | 0,011        | 0,031        | 0,040        |
| V                                         | 0,002        | 0,002        | –            | –            | –            | –            | –            | –            |
| Al <sup>VI</sup>                          | –            | –            | 0,022        | 0,021        | 0,026        | 0,015        | 0,026        | 0,017        |
| Si                                        | 1,931        | 1,941        | 1,943        | 1,963        | 1,931        | 1,933        | 1,912        | 1,914        |
| Al <sup>IV</sup>                          | 0,079        | 0,09         | 0,057        | 0,037        | 0,069        | 0,067        | 0,088        | 0,086        |

Note: Microprobe analysis. 1 – from gabbronorite, Predgorny area; 2 – from olivine gabbronorite, Predgorny area; 3, 4 – from gabbronorites, Predgorny area; 5 – from amphibolized metagabbro, Predgorny area; 6 – from gabbronorite of layered unit (gabbronorite zone-2), East Chuarvy area; 7 – 11 – from gabbronorites of Ore Horizon of East Chuarvy (OHEC), East Chuarvy area; 12 – from gabbronorite of layered unit (gabbronorite zone-2), East Chuarvy area; 13 – from gabbronorite of Ore Horizon of East Chuarvy (OHEC), East Chuarvy area; 14 – from gabbronorite of layered unit (gabbronorite zone-2), East Chuarvy area; 15 – from olivine gabbronorite of layered unit (gabbronorite zone-2), East Chuarvy area; 16, 17 – from magnetite-containing gabbronorites of Ore Horizon of East Chuarvy (OHEC), East Chuarvy area. 1 – 4, 6 – 17 – Samples from the collection of T.V. Rundkvist; 5 – after [22]. n.d. – not detected.

**Table S4.** Chemical composition of plagioclases from the East Pana massif (wt %)

|                                            | 1                 | 2              | 3             | 4             | 5             | 6              | 7             | 8             |
|--------------------------------------------|-------------------|----------------|---------------|---------------|---------------|----------------|---------------|---------------|
| Samples                                    | 53120/<br>2180(2) | 53210/<br>2870 | 6/ 04         | 428/4         | 428/21(1)     | 429/1(3)       | 429/11(2)     | 429/12(3)     |
| SiO <sub>2</sub>                           | 49,473            | 52,309         | 51,497        | 52,014        | 52,743        | 53,052         | 49,488        | 53,449        |
| TiO <sub>2</sub>                           | 0,000             | 0,061          | 0,000         | 0,000         | 0,000         | 0,076          | 0,031         | 0,071         |
| Al <sub>2</sub> O <sub>3</sub>             | 31,148            | 30,332         | 30,512        | 29,980        | 29,341        | 29,550         | 31,747        | 28,229        |
| FeO <sub>total</sub>                       | 0,537             | 0,698          | 0,467         | 0,556         | 0,598         | 0,371          | 0,597         | 0,599         |
| CaO                                        | 15,734            | 12,479         | 13,710        | 13,929        | 12,631        | 12,715         | 14,440        | 12,465        |
| Na <sub>2</sub> O                          | 2,797             | 4,005          | 3,706         | 3,945         | 4,434         | 4,217          | 3,181         | 4,325         |
| K <sub>2</sub> O                           | 0,025             | 0,041          | 0,027         | 0,046         | 0,094         | 0,037          | 0,057         | 0,103         |
| <b>Total</b>                               | <b>99,714</b>     | <b>99,925</b>  | <b>99,919</b> | <b>100,47</b> | <b>99,841</b> | <b>100,019</b> | <b>99,542</b> | <b>99,242</b> |
| Formula coefficients (per 32 oxygen atoms) |                   |                |               |               |               |                |               |               |
| Ca                                         | 3,100             | 2,428          | 2,676         | 2,708         | 2,464         | 2,468          | 2,84          | 2,44          |
| Na                                         | 0,996             | 1,412          | 1,308         | 1,388         | 1,564         | 1,484          | 1,132         | 1,54          |
| K                                          | 0,004             | 0,008          | 0,008         | 0,012         | 0,020         | 0,008          | 0,012         | 0,024         |
| <b>Total X</b>                             | <b>4,100</b>      | <b>3,848</b>   | <b>3,992</b>  | <b>4,108</b>  | <b>4,048</b>  | <b>3,960</b>   | <b>3,984</b>  | <b>4,004</b>  |
| Si                                         | 9,096             | 9,500          | 9,384         | 9,444         | 9,604         | 9,620          | 9,116         | 9,772         |
| Al                                         | 6,748             | 6,492          | 6,552         | 6,416         | 6,296         | 6,316          | 6,872         | 6,084         |
| Fe                                         | –                 | –              | –             | 0,084         | 0,092         | 0,056          | 0,092         | 0,092         |
| Ti                                         | –                 | –              | –             | –             | –             | 0,012          | 0,004         | 0,008         |
| <b>Total Z</b>                             | <b>15,844</b>     | <b>15,992</b>  | <b>15,936</b> | <b>15,944</b> | <b>15,992</b> | <b>16,004</b>  | <b>16,084</b> | <b>15,956</b> |
| Ratio of feldspar end members              |                   |                |               |               |               |                |               |               |
| <i>Or</i>                                  | <i>0,10</i>       | <i>0,21</i>    | <i>0,20</i>   | <i>0,29</i>   | <i>0,49</i>   | <i>0,20</i>    | <i>0,30</i>   | <i>0,60</i>   |
| <i>Ab</i>                                  | <i>24,29</i>      | <i>36,69</i>   | <i>32,77</i>  | <i>33,79</i>  | <i>38,64</i>  | <i>37,470</i>  | <i>28,41</i>  | <i>38,46</i>  |
| <i>An</i>                                  | <i>75,61</i>      | <i>63,10</i>   | <i>67,0</i>   | <i>65,92</i>  | <i>60,87</i>  | <i>62,320</i>  | <i>71,29</i>  | <i>60,94</i>  |



Continuation of Table 4

|                                            | 9             | 10            | 11            | 12            | 13            | 14            | 15            |
|--------------------------------------------|---------------|---------------|---------------|---------------|---------------|---------------|---------------|
| Samples                                    | 429/15(3)     | 429/16(2)     | 445/52,0(3)   | 401/256,1(5)  | 401/230,5     | 401/232,0(2)  | 175/95        |
| SiO <sub>2</sub>                           | 53,151        | 52,588        | 51,808        | 57,784        | 52,797        | 52,485        | 57,612        |
| TiO <sub>2</sub>                           | 0,025         | 0,062         | 0,000         | 0,076         | 0,000         | 0,000         | 0,000         |
| Al <sub>2</sub> O <sub>3</sub>             | 28,318        | 29,347        | 29,219        | 26,176        | 29,280        | 28,775        | 25,193        |
| FeO <sub>total</sub>                       | 0,733         | 0,734         | 0,622         | 0,342         | 0,629         | 0,647         | 0,000         |
| CaO                                        | 13,345        | 12,690        | 14,395        | 8,987         | 12,656        | 12,790        | 11,252        |
| Na <sub>2</sub> O                          | 3,823         | 4,094         | 3,175         | 6,443         | 4,466         | 4,376         | 5,523         |
| K <sub>2</sub> O                           | 0,021         | 0,031         | 0,230         | 0,015         | 0,028         | 0,083         | 0,056         |
| <b>Total</b>                               | <b>99,416</b> | <b>99,543</b> | <b>99,449</b> | <b>99,823</b> | <b>99,856</b> | <b>99,156</b> | <b>99,636</b> |
| Formula coefficients (per 32 oxygen atoms) |               |               |               |               |               |               |               |
| Ca                                         | 2,612         | 2,48          | 2,828         | 1,728         | 2,468         | 2,516         | 2,176         |
| Na                                         | 1,356         | 1,448         | 1,128         | 2,244         | 1,576         | 1,556         | 1,932         |
| K                                          | 0,004         | 0,008         | 0,052         | 0,004         | 0,008         | 0,020         | 0,012         |
| <b>Total X</b>                             | <b>3,972</b>  | <b>3,936</b>  | <b>4,008</b>  | <b>3,976</b>  | <b>4,052</b>  | <b>4,092</b>  | <b>4,120</b>  |
| Si                                         | 9,716         | 9,596         | 9,504         | 10,38         | 9,612         | 9,632         | 10,404        |
| Al                                         | 6,1           | 6,312         | 6,316         | 5,544         | 6,280         | 6,224         | 5,36          |
| Fe                                         | 0,112         | 0,112         | 0,096         | 0,052         | 0,096         | 0,100         | —             |
| Ti                                         | 0,004         | 0,008         | —             | 0,012         | —             | —             | —             |
| <b>Total Z</b>                             | <b>15,932</b> | <b>16,028</b> | <b>15,916</b> | <b>15,988</b> | <b>15,988</b> | <b>15,956</b> | <b>15,764</b> |
| Ratio of feldspar end members              |               |               |               |               |               |               |               |
| <i>Or</i>                                  | <i>0,10</i>   | <i>0,20</i>   | <i>1,30</i>   | <i>0,10</i>   | <i>0,20</i>   | <i>0,49</i>   | <i>0,29</i>   |
| <i>Ab</i>                                  | <i>34,14</i>  | <i>36,79</i>  | <i>28,14</i>  | <i>56,44</i>  | <i>38,89</i>  | <i>38,03</i>  | <i>46,89</i>  |
| <i>An</i>                                  | <i>65,76</i>  | <i>63,01</i>  | <i>70,60</i>  | <i>43,46</i>  | <i>60,90</i>  | <i>61,49</i>  | <i>52,82</i>  |

Note: Microprobe analysis. 1 – 3 – from gabbonorites, Predgorny area; 4 – 10 – from gabbonorites of Ore Horizon of East Chuarvy (OHEC), East Chuarvy area; 11 - from gabbnorite of layered unit (gabbnorite zone-2), East Chuarvy area; 12 – from plagioclase-hornblende rock, East Chuarvy area; 13, 14 – from magnetite-containing gabbnorites of Ore Horizon of East Chuarvy (OHEC), East Chuarvy area; 15 – from gabbro-pegmatite, Sungyok area. Samples from the collection of T.V. Rundkvist.

**Table S5.** Chemical composition of Mg-Fe amphiboles from the East Pana massif (wt %)

|                                            | 1            | 2            | 3            | 4            | 5            |
|--------------------------------------------|--------------|--------------|--------------|--------------|--------------|
| Samples                                    | Smp 26       | Smp 28       | Smp 38       | Smp 39       | Smp 40       |
| SiO <sub>2</sub>                           | 55,32        | 57,64        | 57,60        | 56,92        | 56,4         |
| TiO <sub>2</sub>                           | 0,13         | 0,17         | 0,13         | 0,06         | 0,14         |
| Al <sub>2</sub> O <sub>3</sub>             | 0,94         | 1,64         | 1,06         | 0,90         | 0,60         |
| FeO <sub>total</sub>                       | 12,50        | 15,04        | 15,37        | 15,98        | 16,92        |
| MnO                                        | 0,35         | 0,42         | 0,31         | 0,44         | 0,53         |
| MgO                                        | 26,95        | 23,17        | 23,63        | 24,01        | 21,68        |
| CaO                                        | 0,75         | 0,25         | 0,89         | 1,39         | 0,44         |
| Na <sub>2</sub> O                          | 0,96         | 0,00         | 0,06         | 0,06         | 0,06         |
| K <sub>2</sub> O                           | 0,28         | 0,03         | 0,05         | 0,04         | 0,05         |
| <b>Total</b>                               | <b>98,18</b> | <b>98,36</b> | <b>99,10</b> | <b>99,80</b> | <b>96,82</b> |
| Formula coefficients (per 23 oxygen atoms) |              |              |              |              |              |
| Na                                         | 0,26         | –            | 0,02         | 0,02         | 0,02         |
| K                                          | 0,05         | 0,01         | 0,01         | 0,01         | 0,01         |
| <b>Total A</b>                             | <b>0,31</b>  | <b>0,01</b>  | <b>0,03</b>  | <b>0,03</b>  | <b>0,03</b>  |
| Mg                                         | 5,59         | 4,79         | 4,86         | 4,94         | 4,60         |
| Fe                                         | 1,45         | 1,74         | 1,77         | 1,85         | 2,01         |
| Ca                                         | 0,11         | 0,04         | 0,13         | 0,21         | 0,07         |
| Ti                                         | 0,01         | 0,01         | 0,02         | 0,01         | 0,02         |
| Mn                                         | 0,04         | 0,05         | 0,04         | 0,05         | 0,06         |
| Al <sup>VI</sup>                           | –            | 0,22         | 0,12         | 0,01         | 0,10         |
| <b>Total C</b>                             | <b>7,20</b>  | <b>6,85</b>  | <b>6,94</b>  | <b>7,07</b>  | <b>6,86</b>  |
| Si                                         | 7,70         | 7,99         | 7,95         | 7,86         | 8,02         |
| Al <sup>IV</sup>                           | 0,15         | 0,01         | 0,05         | 0,14         | –            |
| <b>Total T</b>                             | <b>7,85</b>  | <b>8,00</b>  | <b>8,00</b>  | <b>8,00</b>  | <b>8,02</b>  |

Note: Microprobe analysis. 1 – from weakly altered gabbro, central part of East Pana massif; 2 – from amphibolized gabbro, central part of East Pana massif; 3 – from weakly altered gabbro with sulfide mineralization, Chuarvy area; 4 – from leycocratic gabbro, Chuarvy area; 5 – from amphibolized gabbro, Predgorny area. After [22].

**Table S6.** Chemical composition of Ca-amphiboles from the East Pana massif (wt %)

|                                            | 1           | 2           | 3           | 4           | 5            | 6            | 7            | 8            | 9            |
|--------------------------------------------|-------------|-------------|-------------|-------------|--------------|--------------|--------------|--------------|--------------|
| Samples                                    | Smp 43      | Smp 40      | Smp 36      | Smp 31      | 429/5(2a)    | 429/5(3)     | 154/95       | 7069-6       | 7066         |
| SiO <sub>2</sub>                           | 56,45       | 55,58       | 54,16       | 51,60       | 40,032       | 40,291       | 44,63        | 56,459       | 56,071       |
| TiO <sub>2</sub>                           | 0,00        | 0,03        | 0,03        | 0,25        | 0,101        | 0,102        | 0,477        | 0,000        | 0,000        |
| Al <sub>2</sub> O <sub>3</sub>             | 2,25        | 2,60        | 1,71        | 8,53        | 16,032       | 16,693       | 16,033       | 1,849        | 0,408        |
| FeO <sub>total</sub>                       | 6,30        | 9,96        | 13,24       | 15,14       | 18,725       | 18,348       | 19,141       | 6,701        | 9,895        |
| MnO                                        | 0,18        | 0,34        | 0,23        | 0,23        | 0,253        | 0,294        | 0,314        | 0,216        | 0,237        |
| MgO                                        | 19,55       | 18,18       | 15,11       | 10,84       | 7,686        | 7,243        | 5,424        | 19,097       | 18,074       |
| CaO                                        | 14,23       | 11,7        | 13,39       | 11,45       | 12,943       | 12,885       | 10,973       | 12,632       | 13,886       |
| NiO                                        | n.d.        | n.d.        | n.d.        | n.d.        | 0,029        | 0,044        | n.d.         | 0,099        | 0,093        |
| Na <sub>2</sub> O                          | 0,21        | 0,29        | 0,15        | 1,14        | 1,646        | 1,669        | 1,218        | 0,269        | 0,000        |
| K <sub>2</sub> O                           | 0,01        | 0,04        | 0,06        | 0,20        | 0,817        | 0,639        | 0,536        | 0,000        | 0,010        |
| Cl                                         | n.d.        | n.d.        | n.d.        | n.d.        | 0,057        | 0,047        | 0,009        | n.d.         | n.d.         |
| Total                                      | 99,18       | 98,72       | 98,08       | 99,38       | 98,322       | 98,276       | 98,755       | 97,322       | 98,674       |
| Formula coefficients (per 23 oxygen atoms) |             |             |             |             |              |              |              |              |              |
| Ca                                         | 0,10        | –           | 0,07        | –           | 0,177        | 0,125        | –            | –            | 0,096        |
| Na                                         | 0,06        | –           | 0,04        | 0,07        | 0,483        | 0,488        | 0,096        | –            | –            |
| K                                          | –           | 0,01        | 0,01        | 0,04        | 0,158        | 0,127        | 0,101        | –            | 0,002        |
| <b>Total A</b>                             | <b>0,16</b> | <b>0,01</b> | <b>0,12</b> | <b>0,11</b> | <b>0,818</b> | <b>0,740</b> | <b>0,197</b> | <b>0,000</b> | <b>0,098</b> |
| Ca                                         | 2,00        | 1,75        | 2,00        | 1,75        | 1,923        | 1,960        | 1,734        | 1,894        | 2,000        |
| Mg                                         | –           | 0,15        | –           | –           | 0,077        | 0,040        | 0,014        | 0,014        | –            |
| Na                                         | –           | 0,08        | –           | 0,25        | –            | –            | 0,252        | 0,073        | –            |
| <b>Total B</b>                             | <b>2,00</b> | <b>1,98</b> | <b>2,00</b> | <b>2,00</b> | <b>2,000</b> | <b>2,000</b> | <b>2,000</b> | <b>1,981</b> | <b>2,000</b> |
| Mg                                         | 4,02        | 3,64        | 3,24        | 2,31        | 1,658        | 1,588        | 1,178        | 3,971        | 3,796        |
| Fe <sup>+2</sup>                           | 0,73        | 1,16        | 1,59        | 1,80        | 2,371        | 2,314        | 2,361        | 0,784        | 1,134        |
| Mn                                         | 0,02        | 0,04        | 0,03        | 0,03        | 0,032        | 0,038        | 0,039        | 0,026        | 0,028        |
| Ni                                         | –           | –           | –           | –           | 0,004        | 0,005        | –            | 0,011        | 0,011        |
| Al <sup>VI</sup>                           | 0,15        | 0,16        | 0,09        | 0,82        | 0,935        | 1,055        | 1,422        | 0,208        | –            |
| <b>Total C</b>                             | <b>4,92</b> | <b>5,00</b> | <b>4,95</b> | <b>4,96</b> | <b>5,000</b> | <b>5,000</b> | <b>5,000</b> | <b>5,000</b> | <b>4,969</b> |
| Si                                         | 7,78        | 7,73        | 7,8         | 7,34        | 6,062        | 6,076        | 6,582        | 7,903        | 7,900        |
| Al <sup>IV</sup>                           | 0,22        | 0,27        | 0,2         | 0,63        | 1,926        | 1,912        | 1,365        | 0,097        | 0,068        |

|                  |             |             |             |             |              |              |              |              |              |
|------------------|-------------|-------------|-------------|-------------|--------------|--------------|--------------|--------------|--------------|
| Ti               | —           | —           | —           | 0,03        | 0,012        | 0,012        | 0,053        | —            | —            |
| Fe <sup>+3</sup> | —           | —           | —           | —           | —            | —            | —            | —            | 0,032        |
| <b>Total T</b>   | <b>8,00</b> | <b>8,00</b> | <b>8,00</b> | <b>8,00</b> | <b>8,000</b> | <b>8,000</b> | <b>8,000</b> | <b>8,000</b> | <b>8,000</b> |
| Cl               | —           | —           | —           | —           | 0,015        | 0,012        | 0,002        | —            | —            |

Приложение: 1 – from amphibolized gabbro-norite, Predgorny area; 2, 3 – from amphibolized metagabbro, Predgorny area; 4 – from amphibolized gabbro-norite, Chuarvy area; 5, 6 – from gabbro-pegmatite, East Chuarvy area; 7 – from gabbro-pegmatite, Sungyok area; 8, 9 – from metagabbro with sulfide mineralization, Churozero area. 1 – 4 – after [22]; 5 – 9 – samples from the collection of T.V. Rundkvist.
